# Supplementary material
Source: bioRxiv or medRxiv preprint supplement (https://www.biorxiv.org/highwire/filestream/67099/field_highwire_adjunct_files/0/212357-1.pdf)
Supplement: Supplementary file [file 212357-1.pdf]

# Supplementary Materials

## 1. Algorithm details

### 1.1 Step 1. Fitting the logistic mixed model under the null hypothesis

#### 1.1.1 Generalized linear mixed model and penalized quasi-likelihood

Details of fitting the null logistic mixed model and estimating the parameters for fixed effects and variance components are provided in this section. Note that although we use the same restricted log likelihood and average information matrix as in GMMAT<sup>1</sup>, we use a different approach to estimate parameters to make our method feasible for very large datasets. In particular, we use the preconditioned conjugate gradient method<sup>2,3</sup> to solve linear systems instead of obtaining an inverse of the covariance matrix of the phenotypes. For the derivation of the likelihood and information matrix, please refer the GMMAT paper<sup>1</sup>. Logistic mixed model is a part of the larger generalized linear mixed model (GLMM) with the logistic link function for binary outcome. The model can be written as

$$\text{logit}(\mu_i) = X_i\alpha + G_i\beta + b_i$$

where  $\mu_i = P(y_i = 1 | X_i, G_i, b_i)$  is the probability for the  $i$ th individual being a case given the covariates  $X_i$  and genotypes  $G_i$  as well as the random effect  $b_i$ , assumed to be distributed as  $N(0, \tau\psi)$ , where  $\psi$  is an  $N \times N$  genetic relationship matrix (GRM)<sup>33</sup> and  $\tau$  is an additive genetic variance. The phenotype  $y_i$  is assumed to be conditionally independent given  $(X_i, G_i, b_i)$  and follows the binomial distribution with mean  $E(y_i | b_i) = \pi_i$  and variance  $\text{Var}(y_i | b) = \phi v(\pi_i)$ , where  $v(\pi_i) = \mu_i(1 - \mu_i)$  is the variance function, and the dispersion parameter  $\phi = 1$ .

Under the null hypothesis that  $H_0: \beta = 0$ , to estimate  $(\alpha, \phi, \tau)$ , the log integrated quasi-likelihood function can be written as

$$ql(\alpha, \beta = 0, \phi, \tau) = \log \int \exp\{\sum_{i=1}^n ql_i(\alpha, \beta = 0 | b)\} \times (2\pi)^{-\frac{n}{2}} |\tau\psi|^{-\frac{1}{2}} \times \exp\left\{-\frac{1}{2} b^T (\tau\psi)^{-1} b\right\} db, \quad (1)$$

where  $ql_{\square}(\alpha, \beta = 0 | b) = \int_{y_i}^{\mu_i} \frac{a_i(y_i - \mu)}{\phi v(\mu)} d\mu$  is the quasi-likelihood for the  $i$ th individual given the random effect  $b$ . Let  $\kappa(b) = \sum_{i=1}^n ql_i(\alpha, \beta = 0 | b) - \frac{1}{2} b^T (\tau\psi)^{-1} b$ . Approximation for the integral  $\int \exp\{\kappa(b)\} db$  can be obtained using Laplace's method with the first and second derivatives. Let  $\tilde{b}$  denote the solution of  $\kappa'(b) = 0$ , which maximizes  $\kappa(b)$ , and  $W$  denote the weight matrix, which is a diagonal matrix with diagonal terms  $\frac{1}{\phi v(\mu_i) [g'(\mu_i)]^2}$ . Note that since logistic is a canonical link function, the diagonal element of  $W$  can be simplified as  $v(\mu_i)$ . Equation (1) can be written as

$$ql(\alpha, \beta = 0, \phi, \tau) = \kappa(\tilde{b}) - \frac{1}{2} \log |\tau\psi W + I| \quad (2)$$

#### 1.1.2 Estimate parameters using AI-REML

Here we describe iterative steps to estimate  $(\alpha, b, \phi, \tau)$ . To obtain the estimates of the fixed effect coefficients and the random effects given  $(\phi, \tau)$ ,  $(\hat{\alpha}(\phi, \tau), \hat{b}(\phi, \tau))$ , that jointly maximize the  $ql(\alpha, \beta = 0, \phi, \tau)$ , we take the derivative of equation (2) with respect to  $\alpha$  and  $b$  and get the solution for the derivatives to be zero. Assuming the weight matrix  $W$  varies slowly as a function of the conditional mean, the last term in the expression of  $ql(\alpha, \beta = 0, \phi, \tau)$  in equation (2) can be ignored. Let  $\Sigma = W^{-1} + \tau\psi$ ,  $P = \Sigma^{-1} - \Sigma^{-1}X(X^T\Sigma^{-1}X)^{-1}X^T\Sigma^{-1}$  and  $\tilde{Y}$  be a working vector with the  $i$ th element being  $X_i\alpha + b_i + g'(\mu_i)(y_i - \mu_i)$ , and then

$$\hat{\alpha} = (X^T\Sigma^{-1}X)^{-1}X^T\Sigma^{-1}\tilde{Y} \quad (3)$$

$$\hat{b} = \tau\psi\Sigma^{-1}(\tilde{Y} - X\hat{\alpha}) \quad (4)$$

Given  $\hat{\alpha}$  and  $\hat{b}$  estimated,

$$ql(\hat{\alpha}(\phi, \tau), \beta = 0, \phi, \tau) = c - \frac{1}{2} \log|\Sigma| - \frac{1}{2} \tilde{Y}^T P \tilde{Y} \quad (5)$$

The restricted maximum likelihood (REML) version:

$$ql_R(\hat{\alpha}(\phi, \tau), \beta = 0, \phi, \tau) = c_R - \frac{1}{2} \log|\Sigma| - \frac{1}{2} \log|X^T \Sigma^{-1} X| - \frac{1}{2} \tilde{Y}^T P \tilde{Y} \quad (6)$$

To obtain the estimates of the variance components,  $(\phi, \tau)$ , that jointly maximize the  $ql(\hat{\alpha}(\phi, \tau), \beta = 0, \phi, \tau)$ , we take the derivative of equation (6) with respect to  $\phi$  and  $\tau$ :

$$\frac{\partial ql_R(\hat{\alpha}(\phi, \tau), \beta=0, \phi, \tau)}{\partial \phi} = \frac{1}{2\phi} \tilde{Y}^T P W^{-1} P \tilde{Y} - \frac{1}{\phi} tr(P W^{-1}) \quad (7)$$

$$\frac{\partial ql_R(\hat{\alpha}(\phi, \tau), \beta=0, \phi, \tau)}{\partial \tau} = \frac{1}{2} \tilde{Y}^T P \psi P \tilde{Y} - tr(P \psi) \quad (8)$$

To obtain the solutions to make equations (7) and (8) equal to zero, an average information matrix AI is then defined and used in place of the expected information matrix to estimate  $\hat{\phi}$  and  $\hat{\tau}$  iteratively<sup>1</sup>.

Note that for the logistic mixed model,  $\phi = 1$ , so we do not need to obtain (7).

### 1.1.3 Approaches to reduce computation and memory cost.

Preconditioned Conjugate Gradient (PCG): To obtain equations (3)-(8), we need to compute expression forms containing a product of  $\Sigma^{-1}$  and a vector or a matrix, such as  $\Sigma^{-1} X$ , which is very challenging for large cohorts. Computing the  $N \times N$  empirical genetic relationship matrix (GRM)  $\psi = \frac{G_c^T G_c}{M_1}$  costs  $O(M_1 N^2)$ , where  $G_c$  is an  $M_1 \times N$  matrix with genotypes for  $M_1$  genetic markers of  $N$  individuals that are normalized with the means and standard deviations of raw genotypes. Moreover, the Cholesky decomposition used by GMMAT<sup>1</sup> to invert  $\Sigma$  takes  $O(N^3)$  computation and very large memory space, which are not practical for studies with large sample sizes ( $N > 20,000$ ).

Similar to BOLT-LMM<sup>4</sup>, we use two strategies to reduce the computation and memory cost. First, instead of requiring the pre-computed GRM  $\psi$  as an input, we store genotypes for computing GRM in a binary vector and calculate elements of  $\Sigma$  as needed, which reduces the memory usage from  $4N(N+1)$  bytes, given double precision floating number is used to store  $\psi$ , to  $\frac{NM_1}{4}$  bytes. For instance, with  $N=408,961$  white British participants and  $M_1=93,511$  markers, the memory usage drops from 669 Gb to 9.56 Gb with this strategy. Second, the conjugate gradient method is used to calculate the product of  $\Sigma^{-1}$  and a vector by iteratively solving the linear system  $Ax = u$ , where  $A = \Sigma$  and  $u$  is a known vector, such as any column vector in  $X$  matrix. The number of iterations required for convergence of the conjugate gradient algorithm is proportional to  $\sqrt{\kappa(A)}$ , where  $\kappa(A)$  is the condition number for  $A$ <sup>5</sup>. To make the convergence faster, a preconditioner matrix  $Q$  is used so that  $\hat{A} = Q^{-1} A$  and  $\kappa(\hat{A}) < \kappa(A)$ . Here,  $Q$  is an  $N \times N$  diagonal matrix with the diagonal elements of  $\Sigma$  and the calculation of  $Q$  requires  $O(NM_1)$ .

Randomized trace estimator for  $tr(PW^{-1})$  and  $tr(P\psi)$ : The computation of (7) and (8) requires the traces of matrices  $PW^{-1}$  and  $P\psi$ . For this, we use Hutchinson's randomized trace estimator<sup>6,7</sup>. The trace of a matrix  $B$ , such as  $PW^{-1}$  and  $P\psi$ , is estimated by  $\frac{1}{R} \sum_{i=1}^R z_i^T B z_i$ , where  $z_i$ 's are  $R$  independent random vectors whose entries are i.i.d Rademacher random variables ( $P(z_i = \pm 1) = 0.5$ ). A vector  $z_i$  with size  $N$  is randomly drawn from the Rademacher distribution, followed by the calculation for  $z_i^T B z_i$ . This procedure is repeated for  $R$  times and the average of the results for  $z_i^T B z_i$  is the estimate for the trace of the  $B$  matrix. The by default value for  $R$  is set to be 30.

Parallel computation for the vector multiplication: The most time-consuming step of the proposed algorithm is performing PCG, which involves computing a product of the GRM  $\psi$  and a vector  $x$ , i.e.  $\psi x = G_c^T G_c x$ . We use parallel computing techniques to speed up this procedure. In particular, we use Intel Threading Building Block (TBB) implemented in RcppParallel package<sup>8</sup> for the multi-threading

computation. Our approach utilized nearly all CPU cores allocated. For example, the CPU usages on average were 14.6 when 16 CPU cores were allocated.

## 1.2 Step 2. Single variant score tests with SPA

### 1.2.1 Score tests based on logistic mixed model

Given the estimates from step 1 for fixed effect coefficients  $\hat{\alpha}$ , random effects  $\hat{b}$ , and the variance component parameters  $\hat{\phi}$  and  $\hat{\tau}$  under the null hypothesis  $H_0: \beta = 0$ , the score test can be constructed for each genetic marker to be tested. Suppose  $G$  is the  $N \times 1$  genotype vector,  $\hat{\mu}$  is estimate for  $P(Y = 1 | X, \hat{b})$ , are the probabilities for study individuals being a case given the covariates  $X$  and the estimated random effect  $\hat{b}$  from step 1,  $\hat{W}$  is a diagonal vector with diagonal elements  $\hat{\mu}(1 - \hat{\mu})$ , and  $\tilde{G} = G - X(X^T \hat{W} X)^{-1} X^T \hat{W} G$  is the covariate adjusted genotype vector with covariate effects projected out from the raw genotypes<sup>9</sup>. Suppose  $\hat{\Sigma} = \hat{W}^{-1} + \hat{\tau}\psi$  and  $\hat{P} = \hat{\Sigma}^{-1} - \hat{\Sigma}^{-1} X (X^T \hat{\Sigma}^{-1} X)^{-1} X^T \hat{\Sigma}^{-1}$ , and then  $\hat{P}G = \hat{P}\tilde{G}$ . The score test statistics can be written as

$$T = G^T (Y - \hat{\mu}) = G^T \hat{P}\tilde{Y} = \tilde{G}^T \hat{P}\tilde{Y} = \tilde{G}^T (Y - \hat{\mu}),$$

where  $\tilde{Y}$  is the working vector previously defined. The variance of  $T$ ,  $\text{Var}(T) = G^T \hat{P}G = \tilde{G}^T \hat{P}\tilde{G}$ .

### 1.2.2. Estimation of $\text{Var}(T)$

Calculating  $\hat{P}\tilde{G}$  is required for the estimation of  $\text{Var}(T)$ , which is computationally expensive. To avoid to calculate  $\hat{P}\tilde{G}$  to all the variants, we use similar approximation approaches used in BOTL-LMM<sup>4</sup> and GRAMMAR-GAMMAR<sup>10</sup> in which we obtain the ratio between  $\text{Var}(T)$  and  $\text{Var}(T)^* = \tilde{G}^T W \tilde{G}$  using a small number of variants, and estimate variant as  $r\text{Var}(T)^*$ , where  $r = \text{Var}(T) / \text{Var}(T)^*$ . Note that  $\text{Var}(T)^*$  is a variance estimator without accounting the fact that the random effect  $b$  is estimated from data, and the calculation of  $\text{Var}(T)^*$  only requires  $O(N)$  computation.

Here we show that the ratio  $r$  is approximately constant across all variants. For this, we assume that  $\frac{w_i}{\sum_{j=1}^N w_j} = o(1)$ , for all  $i=1, \dots, N$ , where  $w_i$  is the  $i^{\text{th}}$  element of  $W$ . Note that this assumption can only be violated when the covariates are extremely sparse, which rarely happens in real data. First,  $\text{Var}(T)$  can be written as

$$\text{Var}(T) = \tilde{G}^T P \tilde{G} = \tilde{G}^T \hat{\Sigma}^{-1} \tilde{G} - \tilde{G}^T \hat{\Sigma}^{-1} X (X^T \hat{\Sigma}^{-1} X)^{-1} X^T \hat{\Sigma}^{-1} \tilde{G} \quad (3)$$

Since  $\tilde{G}$  is adjusted by covariates, it can be shown that  $(X^T \hat{\Sigma}^{-1} X)^{-1} X^T \hat{\Sigma}^{-1} \tilde{G} = o_p(N^{-\frac{1}{2}})$ , and hence  $\tilde{G}^T \hat{\Sigma}^{-1} X (X^T \hat{\Sigma}^{-1} X)^{-1} X^T \hat{\Sigma}^{-1} \tilde{G} = o_p(1)$ . The first term in (3) is  $\tilde{G}^T \hat{\Sigma}^{-1} \tilde{G} = o_p(N)$ , so (3) can be approximated by  $\tilde{G}^T \hat{\Sigma}^{-1} \tilde{G}$ . Let  $\bar{w}$  be the mean of the diagonal element of  $\hat{W}^{-1}$  and  $\xi = \hat{W}^{-1} - \bar{w}I$ . And then

$$\tilde{G}^T \hat{\Sigma}^{-1} \tilde{G} \approx \tilde{G}^T (\bar{w}I + \hat{\tau}\psi)^{-1} \tilde{G} - G^T (\bar{w}I + \hat{\tau}\psi)^{-1} \xi (\bar{w}I + \hat{\tau}\psi)^{-1} G \quad (4)$$

With the assumption  $\frac{w_i}{\sum_{j=1}^N w_j} = o(1)$ , it can be shown  $\frac{G^T (\bar{w}I + \hat{\tau}\psi)^{-1} \xi (\bar{w}I + \hat{\tau}\psi)^{-1} G}{\tilde{G}^T (\bar{w}I + \hat{\tau}\psi)^{-1} \tilde{G}} = o_p(1)$ , therefore (4) can be approximated by the first term, in which

$$(4) \approx \tilde{G}^T (\bar{w}I + \hat{\tau}\psi)^{-1} \tilde{G} = \tilde{G}^T \psi^{-\frac{1}{2}} \psi^{\frac{1}{2}} (\bar{w}I + \hat{\tau}\psi)^{-1} \psi^{\frac{1}{2}} \psi^{-\frac{1}{2}} \tilde{G} = a^T U \Lambda^{\frac{1}{2}} (\bar{w}I + \hat{\tau}\Lambda)^{-1} \Lambda^{\frac{1}{2}} U a \quad (5)$$

where  $U$  and  $\Lambda$  are eigenvector and eigenvalue matrices of  $\psi$ , and  $a = \psi^{-\frac{1}{2}} \tilde{G}$ . Since correlation matrix of  $a$  is an identity matrix, asymptotically, (4) is closely approximated by the trace of  $cU \Lambda^{\frac{1}{2}} (\bar{w}I + \hat{\tau}\Lambda)^{-1} \Lambda^{\frac{1}{2}} U$ ,

which is  $c \sum_{i=1}^n \lambda_i / (\bar{w} + \hat{r} \lambda_i)$ , where  $c = \text{MAF}(1 - \text{MAF})$ . As the same way,  $\text{Var}(T)^* = \tilde{G}^T \hat{W} \tilde{G} \approx c \sum_{i=1}^n \lambda_i / \bar{w}$ . And hence the ratio is

$$r = \frac{\text{Var}(T)}{\text{Var}(T)^*} \approx \frac{\sum_{i=1}^n \frac{\lambda_i}{\bar{w} + \hat{r} \lambda_i}}{\sum_{i=1}^n \frac{\lambda_i}{\bar{w}}}$$

which is constant across all variants. The variance adjusted score test statistic is

$$T_{adj} = (\hat{r} \tilde{G}^T \hat{W} \tilde{G})^{-1/2} \tilde{G}^T (Y - \hat{\mu})$$

,where  $\hat{r}$  is the estimated  $r$ . In simulation and real data analysis, we used 100 variants to estimate  $r$ . The adjusted test statistic,  $T_{adj}$ , has mean zero and variance is approximately unity.

**Supplementary Figure 1** shows the ratio  $r$  by minor allele counts (MAC) from 1000 simulated markers. The ratio was nearly identical for markers with  $\text{MAC} > 20$  and then variation was increased for extremely rare variants. This figure provides empirical evidence that the equal ratio assumption holds.

### 1.2.3 P-value calculation using SPA

The traditional score test, such as GMMAT, used the fact that the score test statistic asymptotically follows a normal distribution under the null hypothesis of no association. When the case-control ratios are unbalanced and MAC is small, this asymptotic result does not hold and type I error rates can be inflated. To obtain more accurate p-value, we use a fast-version of SPA (fastSPA)<sup>9</sup>, which we have previously developed for logistic regression model. For this, we utilize the fact that phenotype  $Y_i$  independently follows Bernoulli distribution given  $\pi_i$ , and  $T_{adj}$  is a weighted sum of independent Bernoulli random variable. The approximated cumulant generating function (CGF) of  $T_{adj}$  is

$$K(t; \hat{\pi}, c) = \sum_{i=1}^N \log(1 - \hat{\pi}_i + \hat{\pi}_i e^{ct \tilde{G}_i}) - ct \sum_{i=1}^N \tilde{G}_i \hat{\pi}_i$$

where the constant  $c = \text{Var}^*(T)^{-1/2}$ , which provide  $K'(0) = 0$  and  $K''(0) = 1$ , where  $K'$  and  $K''$  are first and second derivate of  $K$  with respect to  $t$ . Note that since  $K$  uses  $\hat{\pi}$ , which is estimated from data, it is an approximation of the true CGF. Now we use the saddle point method to estimate the p-value. To calculate the probability that  $T_{adj} < q$ , where  $q$  is an observed test statistic, we use the following formula<sup>31 35 36</sup>.

$$\text{pr}(T_{adj} < q) \approx F(q) = \Phi \left\{ w + \frac{1}{w} \log \left( \frac{v}{w} \right) \right\}$$

,where  $w = \text{sign}(\hat{\zeta}) [2\{\hat{\zeta} q - K(\hat{\zeta})\}]^{1/2}$ ,  $v = \hat{\zeta} \{K''(\hat{\zeta})\}^{1/2}$  and  $\hat{\zeta} = \hat{\zeta}(q)$  is the solution of the equation  $K'(\hat{\zeta}) = q$ . As the fastSPA<sup>9</sup>, we exploit the sparsity of genotype vector when MAF of variants are low. In addition, since normal approximation performs well when the test statistic is close to the mean, we use normal distribution when the test statistic is within two standard deviations of the mean.

### 1.2.4 Effect size estimation

To rapidly estimate the effect size  $\hat{\beta}$ , which equals to the natural logarithm of the odds ratio, we use the variance component estimate under the null hypothesis. Note that a similar approach has been used in EMMAX<sup>11</sup> and GRAMMAR-Gamma<sup>10</sup>. Our  $\hat{\beta}$  estimate is

$$\hat{\beta} = (\tilde{G}^T \hat{P} \tilde{G})^{-1} \tilde{G}^T \hat{P} \tilde{Y}$$

Since  $T = \tilde{G}^T \hat{P} \tilde{Y}$  and  $\text{Var}(T) = \tilde{G}^T \hat{P} \tilde{G}$ ,  $\hat{\beta}$  can be written as  $T / \text{Var}(T)$ . In the section 1.2.2, we have shown that  $\text{Var}(T) = \hat{r} \text{Var}(T)^* = \hat{r} \tilde{G}^T \hat{W} \tilde{G}$ . Therefore,  $\hat{\beta}$  can estimated using  $T$ ,  $\text{Var}(T)^*$ , and  $\hat{r}$ , which have already been calculated for association p-value estimation. To estimate the standard error and confidence interval, we use p-values. The standard error of  $\hat{\beta}$ ,  $SE(\hat{\beta}) = |\hat{\beta} / z|$ , where  $z$ -score corresponds to the association p-value/2.

## 2. Supplementary figures

**Supplementary Figure 1.** Plot of the ratio of the variances of the score statistics with and without incorporating the variance components for the random effects for A. 1,000 simulated markers with MAF spectrum shown in **Supplementary Figure 8** and B. 669 out of 1,000 markers that have MAC < 200. 1,000 families were simulated based on the pedigree structure shown in **Supplementary Figure 4** with case control ratio 1:9.

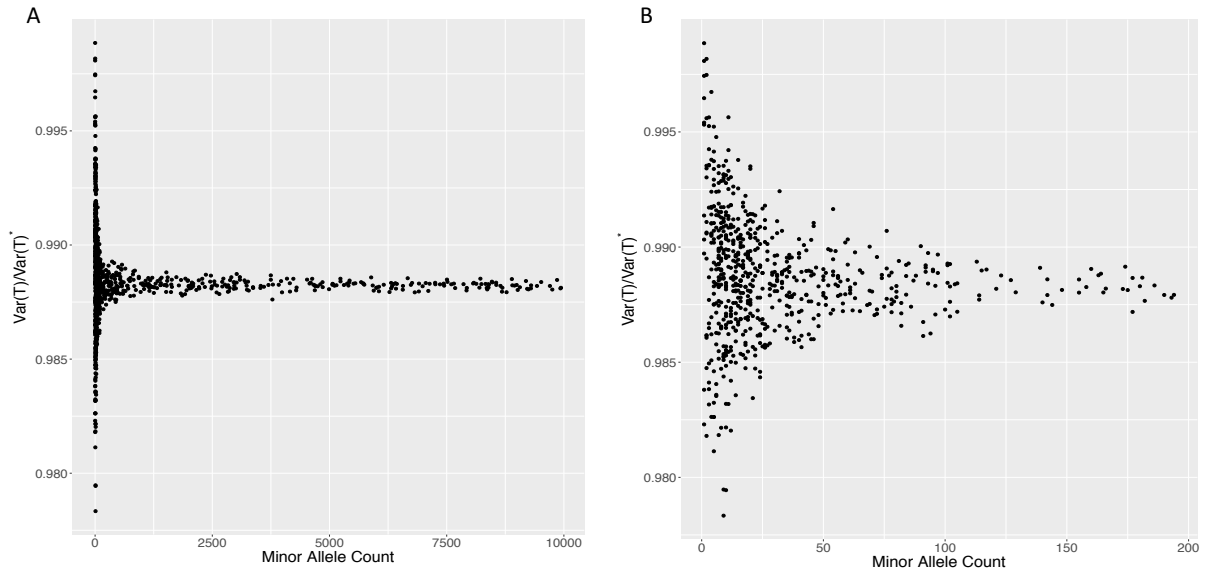

**Supplementary Figure 2.** Log-log plots of the estimated run time (A) and memory use (B) as a function of sample size (N). Numerical data are provided in **Supplementary Table 1**. Benchmarking was performed on randomly sub-sampled UK Biobank data with 408,458 white British participants and 200,000 markers for the cardiovascular diseases (PheCode = 411). The plotted run time is the projected computation time for testing 71 million markers with  $\text{info} \geq 0.3$ . The reported run times are medians of five runs with samples randomly selected from the full sample set using different sampling seeds. Software versions: BOLT-LMM, v2.3; GEMMA, v0.96. BOLT-LMM: compute association statistics under the non-infinitesimal model; BOLT-LMM\_ImmInfOnly: compute mixed model association statistics under the infinitesimal model

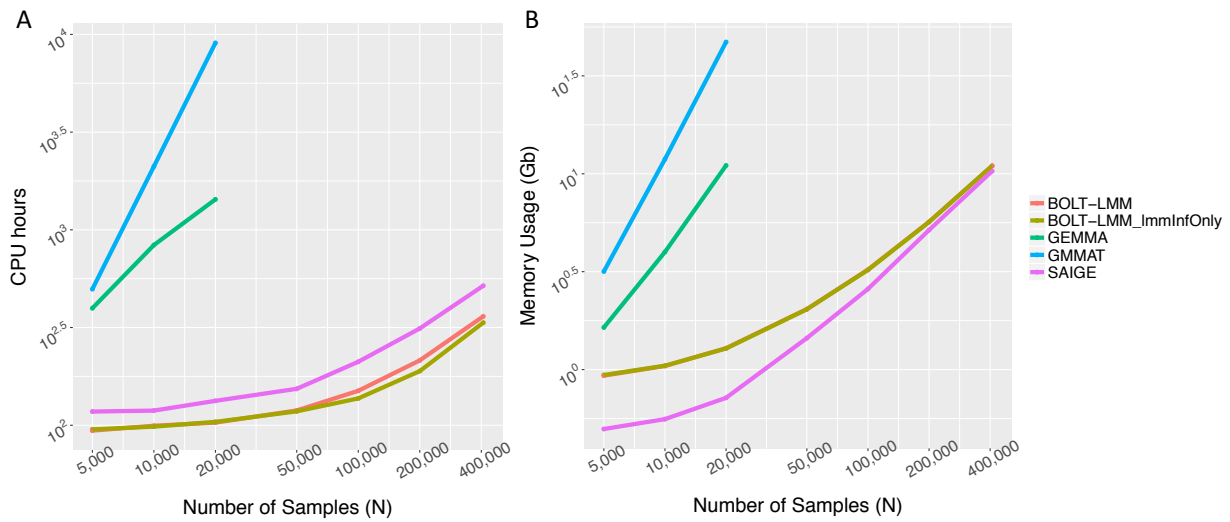

**Supplementary Figure 3.** Histogram of case-control ratios of 1,663 disease-specific binary phenotypes in the UK Biobank data. Phenotypes were constructed based on ICD-9 and ICD-10 codes using a previously described scheme<sup>12</sup>.

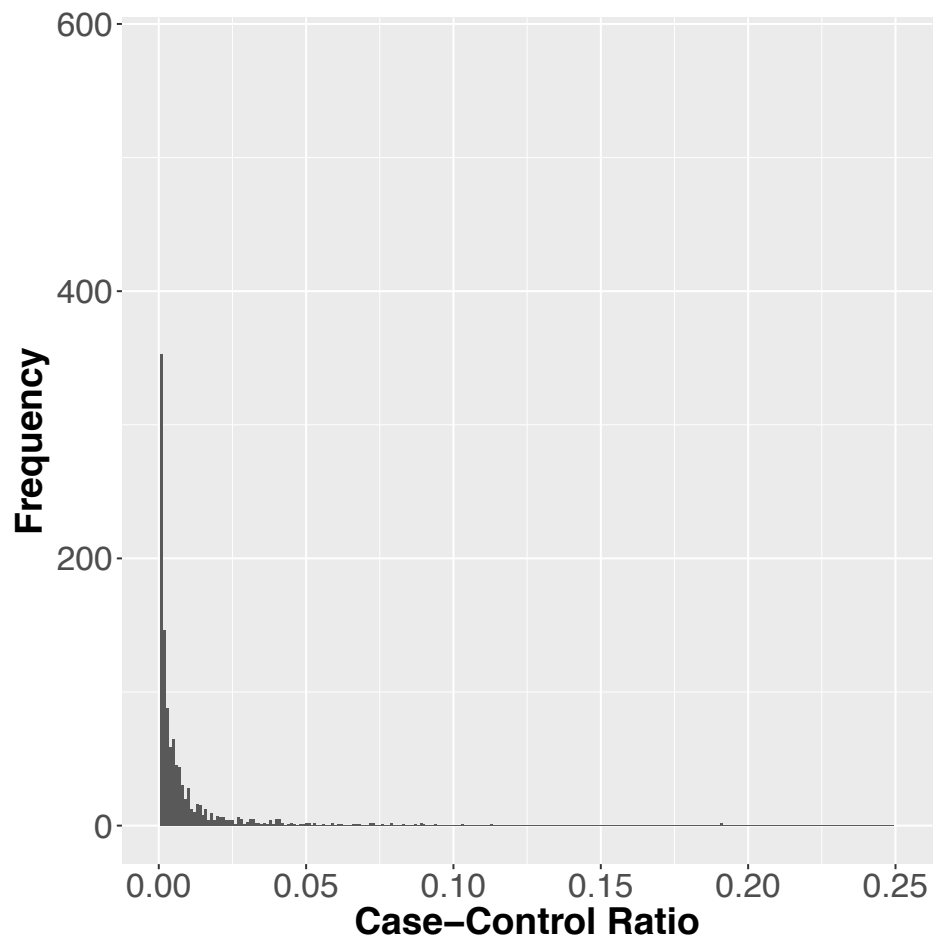

Supplementary Figure 4. Pedigree of families, each with 10 members, in the simulation study.

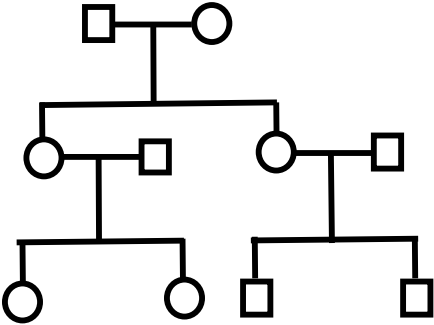



**Supplementary Figure 5.** Quantile-quantile plots of association p-values for 1,000,000 variants having MAF = 0.005 from the simulation study. The first column is p-values from SAIGE. The second column is for p-values from SAIGE-NoSPA. The third column is for p-values from the GMMAT<sup>1</sup> program. The fourth column is comparing the p-values from SAIGE and from GMMAT<sup>1</sup>. The fifth column is comparing the p-values from SAIGE-NoSPA and from GMMAT<sup>1</sup>. The black lines indicate  $x = y$ .

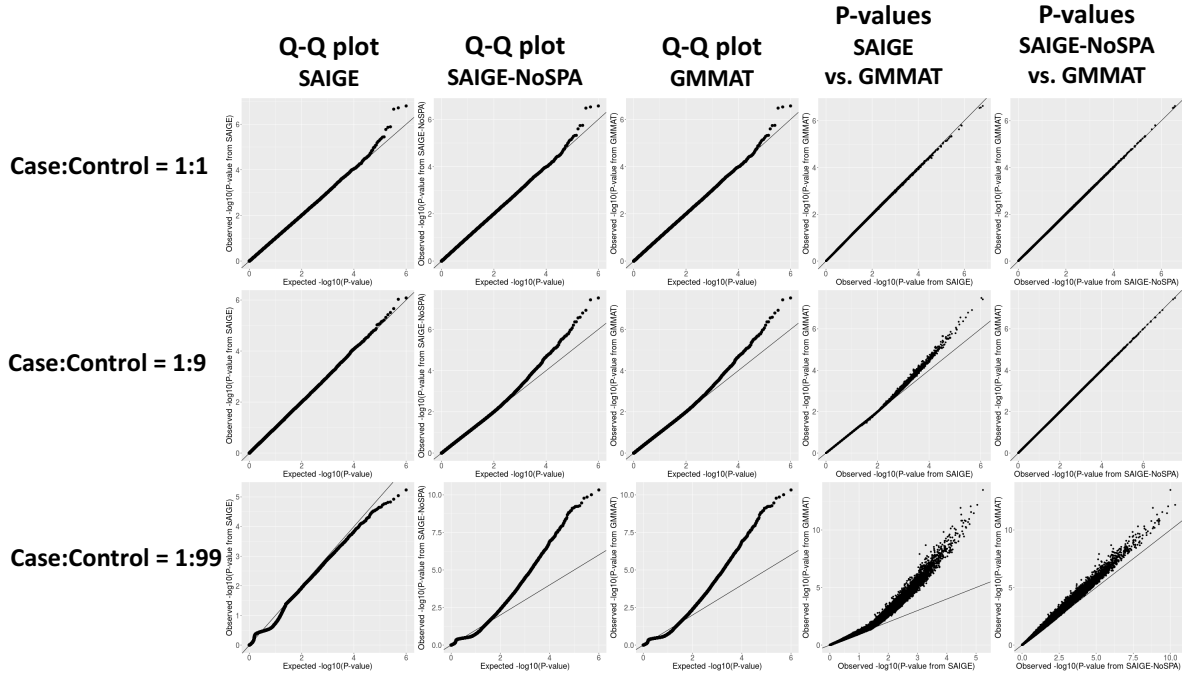

**Supplementary Figure 6.** Quantile-quantile plots of association p-values for 100,000 variants with 10,000 samples with very unbalanced case-control ratio 1:99 from the simulation study. The first column is p-values from SAIGE. The second column is for p-values from SAIGE-NoSPA. The third column is for p-values from the GMMAT<sup>1</sup> program. The fourth column is comparing the p-values from SAIGE and from GMMAT<sup>1</sup>. The fifth column is comparing the p-values from SAIGE-NoSPA and from GMMAT<sup>1</sup>. The black lines indicate  $x = y$ .

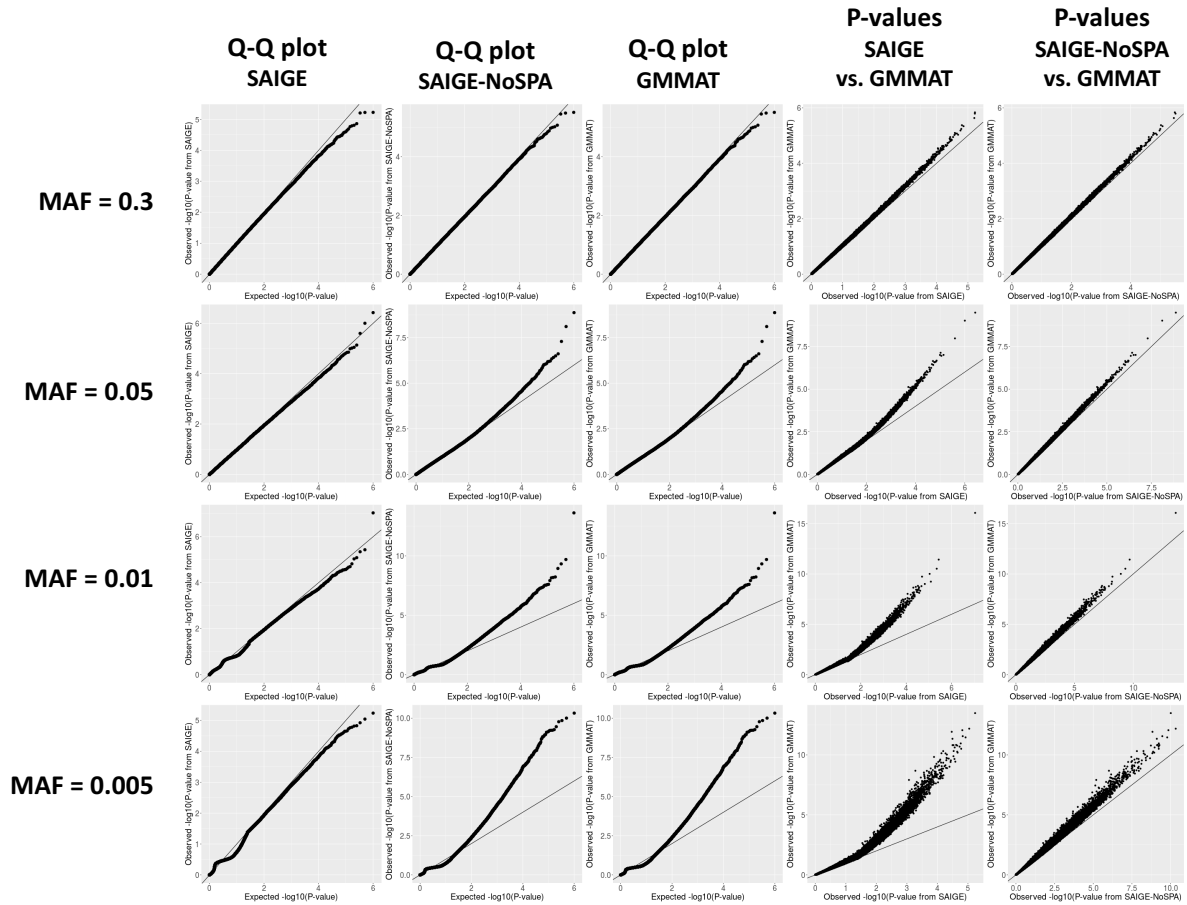

**Supplementary Figure 7.** Empirical power of SAIGE, SAIGE-NoSPA (asymptotically equivalent to GMMAT), BOLT-LMM\_ImmInfOnly (compute mixed model association statistics under the infinitesimal model), and BOLT-LMM (compute mixed model association statistics under the non-infinitesimal model) at the test-specific empirical  $\alpha$  levels that yield type I error rate  $\alpha = 5 \times 10^{-8}$

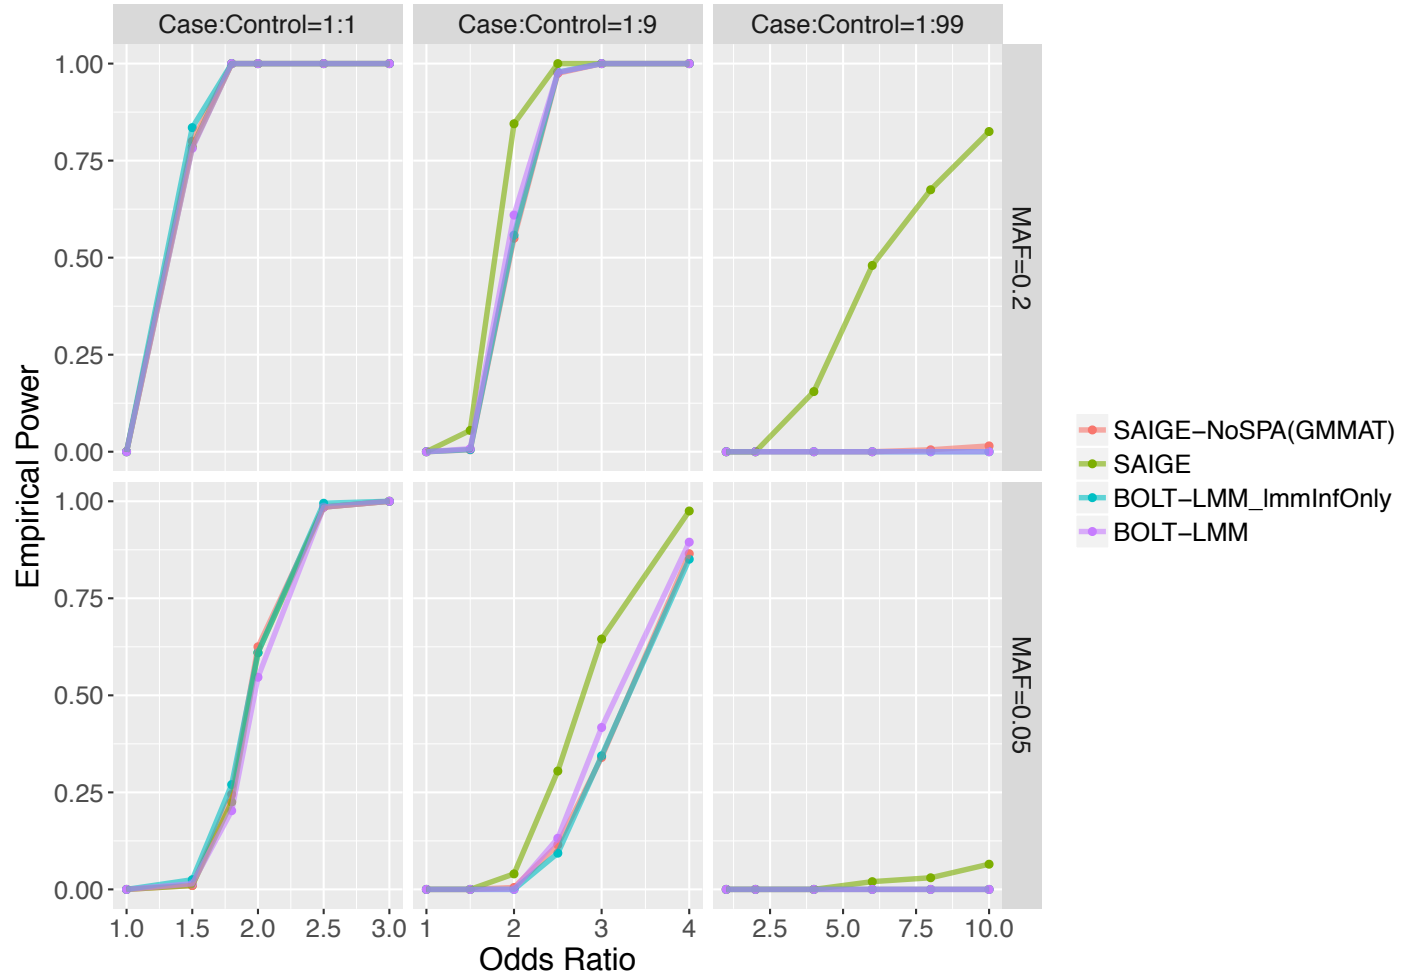

**Supplementary Figure 8.** Distribution of the minor allele frequency spectrum for randomly selected 1,000,000 markers in the simulation study.

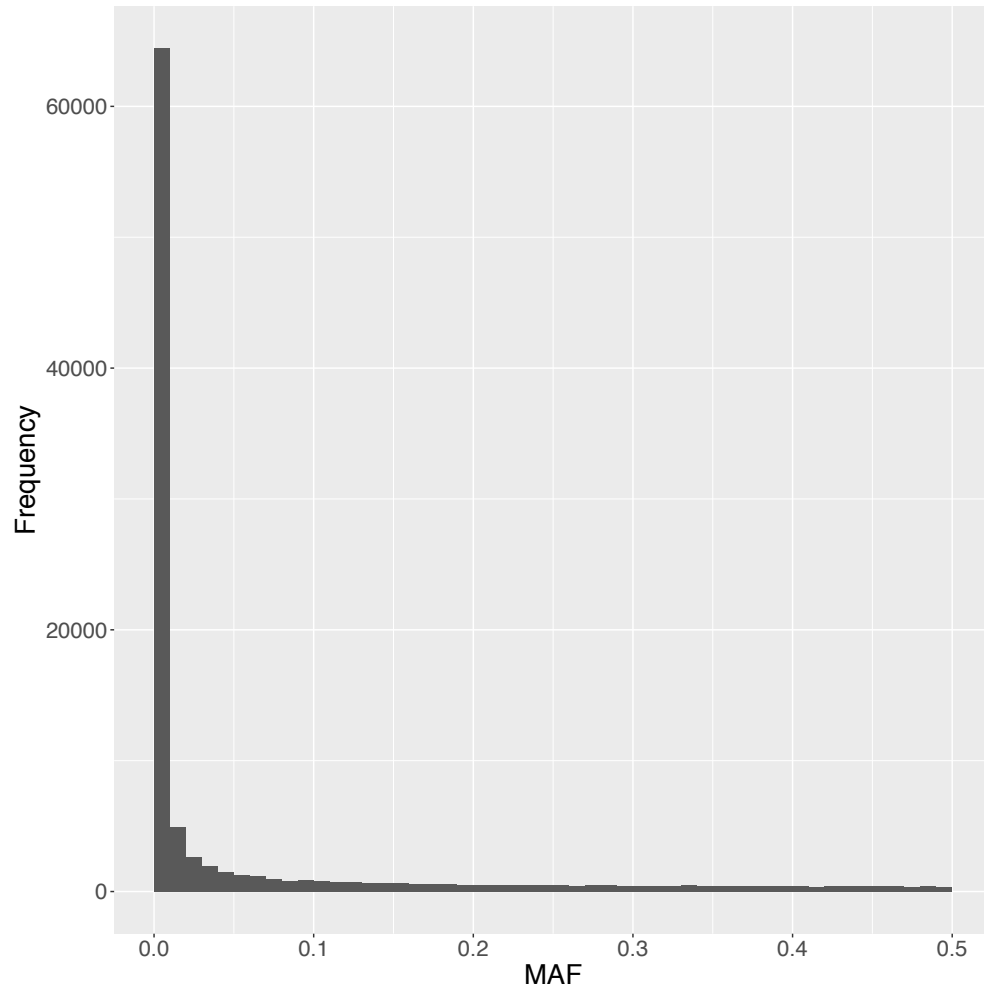

### 3. Supplementary tables

**Supplementary Table 1.** The estimated run time (A) and memory use (B) across different sample sizes. Benchmarking was performed on randomly sub-sampled UK Biobank data with 408,458 white British participants and 200,000 markers for the cardiovascular diseases (PheCode = 411). The plotted run time is the projected computation time for testing 71 million markers with  $\text{info} \geq 0.3$ . The reported run times are medians of five runs with samples randomly selected from the full sample set using different sampling seeds. Software versions: BOLT-LMM, v2.3; GEMMA, v0.96. BOLT-LMM: compute non-infinitesimal association statistics; BOLT-LMM\_ImmInfOnly: compute mixed model association statistics under the infinitesimal model

| Sample Size(N) | Time (CPU hours) | Memory(Gb) | Tests               |
|----------------|------------------|------------|---------------------|
| 5,000          | 497.19           | 3.17       | GMMAT               |
| 10,000         | 2109.83          | 11.88      | GMMAT               |
| 20,000         | 9046.04          | 47.09      | GMMAT               |
| 5,000          | 95.18            | 0.94       | BOLT-LMM_ImmInfOnly |
| 10,000         | 98.40            | 1.05       | BOLT-LMM_ImmInfOnly |
| 20,000         | 104.05           | 1.28       | BOLT-LMM_ImmInfOnly |
| 50,000         | 117.80           | 2.03       | BOLT-LMM_ImmInfOnly |
| 100,000        | 137.16           | 3.23       | BOLT-LMM_ImmInfOnly |
| 200,000        | 189.28           | 5.67       | BOLT-LMM_ImmInfOnly |
| 408,458        | 335.00           | 10.98      | BOLT-LMM_ImmInfOnly |
| 5,000          | 93.89            | 0.93       | BOLT-LMM            |
| 10,000         | 99.39            | 1.04       | BOLT-LMM            |
| 20,000         | 103.15           | 1.29       | BOLT-LMM            |
| 50,000         | 119.03           | 2.04       | BOLT-LMM            |
| 100,000        | 150.02           | 3.24       | BOLT-LMM            |
| 200,000        | 214.71           | 5.69       | BOLT-LMM            |
| 408,458        | 360.63           | 10.98      | BOLT-LMM            |
| 5,000          | 397.00           | 1.64       | GEMMA               |
| 10,000         | 835.59           | 3.99       | GEMMA               |
| 20,000         | 1431.69          | 11.03      | GEMMA               |
| 5,000          | 117.50           | 0.50       | SAIGE               |
| 10,000         | 118.83           | 0.56       | SAIGE               |
| 20,000         | 133.32           | 0.72       | SAIGE               |
| 50,000         | 153.60           | 1.45       | SAIGE               |
| 100,000        | 211.21           | 2.58       | SAIGE               |
| 200,000        | 312.81           | 5.16       | SAIGE               |
| 408,458        | 517.38           | 10.32      | SAIGE               |

**Supplementary Table 2.** Number of genetic variants and loci that passed the genome-wide significant threshold ( $P < 5 \times 10^{-8}$ ) for the three 'real data' phenotypes identified by SAIGE, SAIGE-NoSPA (asymptotically equivalent to GMMAT), and BOLT-LMM in the UK Biobank data. Since results from SAIGE-NoSPA and BOLT-LMM contain many false positive signals for colorectal cancer and thyroid cancer, the numbers of loci are not provided.

| Phenotype                                                   | Tests       | Number of variants with p-value $< 5 \times 10^{-8}$ | Number of all loci with top p-value $< 5 \times 10^{-8}$ | Number of all loci with top p-value $< 5 \times 10^{-8}$ and have not been previously reported |
|-------------------------------------------------------------|-------------|------------------------------------------------------|----------------------------------------------------------|------------------------------------------------------------------------------------------------|
| Cardiovascular diseases<br>PheCode 411<br>case:control 1:12 | SAIGE       | 1,733                                                | 40                                                       | 6                                                                                              |
|                                                             | SAIGE-NoSPA | 1,820                                                | 101                                                      | 68                                                                                             |
|                                                             | BOLT-LMM    | 1,886                                                | 89                                                       | 58                                                                                             |
| Colorectal cancer<br>PheCode 153<br>case:control 1:84       | SAIGE       | 77                                                   | 3                                                        | 3                                                                                              |
|                                                             | SAIGE-NoSPA | 2,950                                                | NA                                                       | NA                                                                                             |
|                                                             | BOLT-LMM    | 3,349                                                | NA                                                       | NA                                                                                             |
| Thyroid cancer<br>PheCode 193<br>case:control=1:1138        | SAIGE       | 125                                                  | 1                                                        | 1                                                                                              |
|                                                             | SAIGE-NoSPA | 73,382                                               | NA                                                       | NA                                                                                             |
|                                                             | BOLT-LMM    | 79,269                                               | NA                                                       | NA                                                                                             |

**Supplementary Table 3.** Loci that passed the genome-wide significant threshold ( $P < 5 \times 10^{-8}$ ) for the three phenotypes identified by the SAIGE in the UK Biobank data.

| Phenotype                                                       | Location    | Chr:Pos     | rsID        | Ref | Alt        | Function                | Gene                   | MAF     | Sample Size | P value  | Known for CAD   | Previous Findings |
|-----------------------------------------------------------------|-------------|-------------|-------------|-----|------------|-------------------------|------------------------|---------|-------------|----------|-----------------|-------------------|
| Cardiovascular diseases<br>PheCode 411<br>case:control<br>=1:12 | 1p32.3      | 1:55505647  | rs11591147  | G   | T          | Exonic                  | PCSK9                  | 0.018   | 408,458     | 2.30E-12 | known           | <sup>13</sup>     |
|                                                                 | 1p32.2      | 1:56966350  | rs17114046  | A   | G          | Intronic                | PLPP3                  | 0.092   | 408,458     | 1.36E-11 | known           | <sup>14</sup>     |
|                                                                 | 1p13.3      | 1:109817590 | rs12740374  | G   | T          | UTR3                    | CELSR2                 | 0.222   | 408,458     | 1.68E-25 | known           | <sup>14</sup>     |
|                                                                 | 1q41        | 1:222814442 | rs2133189   | C   | T          | Intronic                | MIA3                   | 0.286   | 408,458     | 2.35E-11 | known           | <sup>14</sup>     |
|                                                                 | 2p24.1      | 2:19942473  | rs16986953  | G   | A          | Intergenic              | OSR1;<br>LINC00954     | 0.068   | 408,458     | 9.96E-09 | known           | <sup>14</sup>     |
|                                                                 | 2p11.2      | 2:85767735  | rs2028900   | C   | T          | Intronic                | MAT2A                  | 0.450   | 408,458     | 1.82E-08 | known           | <sup>14</sup>     |
|                                                                 | 2q33.2      | 2:203968973 | rs72934535  | T   | C          | Intronic                | NBEAL1                 | 0.108   | 408,458     | 7.14E-09 | known           | <sup>14</sup>     |
|                                                                 | 3q22.3      | 3:136294757 | rs13065626  | C   | G          | Intronic                | STAG1                  | 0.137   | 408,458     | 1.63E-08 | known           | <sup>14</sup>     |
|                                                                 | 4q32.1      | 4:156645513 | rs13139571  | C   | A          | Intronic                | GUCY1A3                | 0.233   | 408,458     | 2.94E-10 | known           | <sup>14</sup>     |
|                                                                 | 6p24.1      | 6:12903957  | rs9349379   | A   | G          | Intronic                | PHACTR1                | 0.405   | 408,458     | 6.30E-19 | known           | <sup>14</sup>     |
|                                                                 | 6p21.33     | 6:31881731  | rs685031    | G   | A          | Intronic                | C2                     | 0.389   | 408,458     | 9.26E-09 | known           | <sup>14</sup>     |
|                                                                 | 6p11.2      | 6:57113816  | rs430918    | C   | T          | Intergenic              | RAB23;<br>LOC100506188 | 0.066   | 408,458     | 4.79E-08 | potential novel |                   |
|                                                                 | 6q14.1      | 6:82459034  | rs78707197  | T   | C          | UTR3                    | FAM46A                 | 0.022   | 408,458     | 3.75E-10 | potential novel |                   |
|                                                                 | 6q23.2      | 6:134204247 | rs12194592  | A   | G          | ncRNA_intronic          | TARID                  | 0.307   | 408,458     | 1.95E-10 | known           | <sup>14</sup>     |
|                                                                 | 6q26        | 6:161005610 | rs55730499  | C   | T          | Intronic                | LPA                    | 0.081   | 408,458     | 4.48E-62 | known           | <sup>14</sup>     |
|                                                                 | 7p21.1      | 7:19049388  | rs2107595   | G   | A          | Intergenic              | HDAC9;<br>TWIST1       | 0.152   | 408,458     | 4.23E-10 | known           | <sup>14</sup>     |
|                                                                 | 7q36.1      | 7:150690176 | rs3918226   | C   | T          | Intronic                | NOS3                   | 0.081   | 408,458     | 1.92E-10 | known           | <sup>15</sup>     |
|                                                                 | 8p21.3      | 8:19870271  | rs35237252  | C   | A          | Intergenic              | LPL;SLC18A1            | 0.251   | 408,458     | 4.68E-08 | known           | <sup>14</sup>     |
|                                                                 | 9p21.3      | 9:22103813  | rs1333042   | A   | G          | ncRNA_intronic          | CDKN2B-AS1             | 0.496   | 408,458     | 2.29E-72 | known           | <sup>14</sup>     |
|                                                                 | 9q21.12     | 9:73553245  | rs150282530 | C   | T          | Intronic                | TRPM3                  | 0.001   | 408,458     | 3.45E-08 | potential novel |                   |
| 10p11.23                                                        | 10:30317073 | rs9337951   | G           | A   | Exonic     | JCAD                    | 0.345                  | 408,458 | 7.32E-09    | known    | <sup>14</sup>   |                   |
| 10q11.21                                                        | 10:44687780 | rs11238907  | T           | G   | Intergenic | LINC00841;<br>C10orf142 | 0.115                  | 408,458 | 1.88E-08    | known    | <sup>14</sup>   |                   |
| 11p15.4                                                         | 11:9766932  | rs378825    | A           | G   | Intronic   | SWAP70                  | 0.427                  | 408,458 | 3.43E-08    | known    | <sup>14</sup>   |                   |

|                                                            |          |              |             |   |   |                |                      |       |         |          |                 |               |
|------------------------------------------------------------|----------|--------------|-------------|---|---|----------------|----------------------|-------|---------|----------|-----------------|---------------|
|                                                            | 11q22.1  | 11:100593538 | rs633185    | G | C | Intronic       | ARHGAP42             | 0.285 | 408,458 | 8.81E-09 | potential novel |               |
|                                                            | 11q22.3  | 11:103673294 | rs2839812   | T | A | Intergenic     | DYNC2H1;<br>MIR4693  | 0.279 | 408,458 | 1.10E-11 | known           | <sup>14</sup> |
|                                                            | 11q23.3  | 11:120233626 | rs7924772   | A | G | intronic       | ARHGEF12             | 0.387 | 408,458 | 2.42E-09 | potential novel |               |
|                                                            | 12q13.13 | 12:54513915  | rs11170820  | C | G | ncRNA_exonic   | FLJ12825             | 0.058 | 408,458 | 1.33E-09 | known           | <sup>16</sup> |
|                                                            | 12q24.12 | 12:111904371 | rs4766578   | T | A | intronic       | ATXN2                | 0.495 | 408,458 | 7.97E-14 | known           | <sup>14</sup> |
|                                                            | 12q24.13 | 12:112486818 | rs17696736  | A | G | intronic       | NAA25                | 0.428 | 408,458 | 7.93E-11 | known           | <sup>14</sup> |
|                                                            | 12q24.31 | 12:121416650 | rs1169288   | A | C | exonic         | HNF1A                | 0.313 | 408,458 | 1.37E-09 | known           | <sup>17</sup> |
|                                                            | 13q34    | 13:110837553 | rs638634    | C | T | intronic       | COL4A1               | 0.302 | 408,458 | 1.41E-08 | known           | <sup>14</sup> |
|                                                            | 15q25.1  | 15:79132330  | rs11072811  | A | C | intergenic     | ADAMTS7;<br>MORF4L1  | 0.492 | 408,458 | 1.28E-10 | known           | <sup>14</sup> |
|                                                            | 15q26.1  | 15:91429287  | rs4932373   | A | C | intronic       | FES                  | 0.326 | 408,458 | 1.84E-17 | known           | <sup>14</sup> |
|                                                            | 16q23.3  | 16:83045790  | rs7500448   | A | G | Intronic       | CDH13                | 0.254 | 408,458 | 8.32E-10 | known           | <sup>16</sup> |
|                                                            | 17q21.32 | 17:47340297  | rs2011767   | C | T | Intergenic     | FLJ40194;<br>MIR6129 | 0.459 | 408,458 | 1.33E-13 | known           | <sup>14</sup> |
|                                                            | 17q21.33 | 17:47450057  | rs7209400   | C | T | ncRNA_intronic | LOC102724596         | 0.453 | 408,458 | 2.25E-12 | known           | <sup>14</sup> |
|                                                            | 18q21.2  | 18:52723198  | rs550780826 | A | G | Intergenic     | CCDC68;<br>LINC01929 | 0.004 | 408,458 | 1.91E-08 | potential novel |               |
|                                                            | 19p13.2  | 19:11188164  | rs56125973  | T | C | Intergenic     | SMARCA4;<br>LDLR     | 0.118 | 408,458 | 3.99E-13 | known           | <sup>14</sup> |
|                                                            | 19q13.32 | 19:45412079  | rs7412      | C | T | Exonic         | APOE                 | 0.081 | 408,458 | 6.98E-17 | known           | <sup>14</sup> |
|                                                            | 21q22.11 | 21:35593827  | rs28451064  | G | A | Intergenic     | LINC00310;<br>KCNE2  | 0.132 | 408,458 | 1.24E-14 | known           | <sup>14</sup> |
| Colorectal cancer<br>PheCode 153<br>case:control =<br>1:84 | 8q24.21  | 8:128413305  | rs6983267   | G | T | ncRNA_exonic   | CCAT2                | 0.481 | 387,318 | 7.03E-12 | known           | <sup>18</sup> |
|                                                            | 15q13.3  | 15:33001734  | rs58658771  | T | A | Intergenic     | SCG5;<br>GREM1       | 0.179 | 387,318 | 1.41E-10 | known           | <sup>19</sup> |
|                                                            | 18q21.1  | 18:46448805  | rs6507874   | T | C | Intronic       | SMAD7                | 0.473 | 387,318 | 1.93E-14 | known           | <sup>20</sup> |
| Thyroid cancer<br>PheCode 193<br>case:control<br>=1:1138   | 9q22.33  | 9:100546600  | rs925489    | C | T | ncRNA_intronic | PTCSC2               | 0.332 | 407,757 | 5.43E-11 | known           | <sup>21</sup> |



**Supplementary Table 4.** Estimated inflation factors of the genomic controls at different p-value quantiles and different MAF cutoffs for SAIGE, SAIGE-NoSPA, and BOLT-LMM test applied on three different phenotypes for 28 million successfully imputed genetic markers (imputation info  $\geq$  0.3 and MAC  $\geq$  20) from the UK Biobank data

| Phenotype                                                   | Test         | MAF cutoffs | Genomic Control at $q^{\text{th}}$ p-value quantile |         |                                    |         |
|-------------------------------------------------------------|--------------|-------------|-----------------------------------------------------|---------|------------------------------------|---------|
|                                                             |              |             | Including previously reported loci                  |         | Excluding previously reported loci |         |
|                                                             |              |             | q=0.01                                              | q=0.001 | q=0.01                             | q=0.001 |
| Cardiovascular diseases<br>PheCode 411<br>case:control 1:12 | All variants | SAIGE       | 1.13                                                | 1.237   | 1.11                               | 1.163   |
|                                                             |              | SAIGE-noSPA | 1.152                                               | 1.324   | 1.131                              | 1.242   |
|                                                             |              | BOLT-LMM    | 1.129                                               | 1.306   | 1.108                              | 1.225   |
|                                                             | > 0.01       | SAIGE       | 1.357                                               | 1.718   | 1.281                              | 1.448   |
|                                                             |              | SAIGE-noSPA | 1.357                                               | 1.719   | 1.281                              | 1.449   |
|                                                             |              | BOLT-LMM    | 1.356                                               | 1.709   | 1.277                              | 1.433   |
|                                                             | < 0.01       | SAIGE       | 1.044                                               | 1.039   | 1.043                              | 1.038   |
|                                                             |              | SAIGE-noSPA | 1.067                                               | 1.159   | 1.066                              | 1.158   |
|                                                             |              | BOLT-LMM    | 1.031                                               | 1.13    | 1.028                              | 1.13    |
| Colorectal cancer<br>PheCode 153<br>case:control 1:84       | All variants | SAIGE       | 1.014                                               | 1.026   | 1.01                               | 1.014   |
|                                                             |              | SAIGE-noSPA | 1.186                                               | 1.555   | 1.181                              | 1.545   |
|                                                             |              | BOLT-LMM    | 1.188                                               | 1.577   | 1.182                              | 1.567   |
|                                                             | > 0.01       | SAIGE       | 1.051                                               | 1.116   | 1.039                              | 1.073   |
|                                                             |              | SAIGE-noSPA | 1.052                                               | 1.121   | 1.04                               | 1.077   |
|                                                             |              | BOLT-LMM    | 1.057                                               | 1.126   | 1.044                              | 1.085   |
|                                                             | < 0.01       | SAIGE       | 0.999                                               | 0.993   | 0.998                              | 0.992   |
|                                                             |              | SAIGE-noSPA | 1.253                                               | 1.683   | 1.251                              | 1.681   |
|                                                             |              | BOLT-LMM    | 1.255                                               | 1.709   | 1.255                              | 1.709   |
| Thyroid cancer<br>PheCode 193<br>case:control=1:1138        | All variants | SAIGE       | 1.012                                               | 0.992   | 1.011                              | 0.989   |
|                                                             |              | SAIGE-noSPA | 1.964                                               | 4.195   | 1.963                              | 4.194   |
|                                                             |              | BOLT-LMM    | 2                                                   | 4.497   | 1.989                              | 4.497   |
|                                                             | > 0.01       | SAIGE       | 1.01                                                | 1.036   | 1.007                              | 1.026   |
|                                                             |              | SAIGE-noSPA | 1.015                                               | 1.069   | 1.012                              | 1.058   |
|                                                             |              | BOLT-LMM    | 1.02                                                | 1.074   | 1.017                              | 1.064   |
|                                                             | < 0.01       | SAIGE       | 1.013                                               | 0.977   | 1.013                              | 0.977   |
|                                                             |              | SAIGE-noSPA | 2.432                                               | 4.737   | 2.434                              | 4.737   |
|                                                             |              | BOLT-LMM    | 2.479                                               | 5.096   | 2.479                              | 5.096   |

**Supplementary Table 5.** Empirical type 1 error rates for SAIGE, SAIGE-NoSPA, GMMAT, and BOLT-LMM estimated based on  $10^9$  simulated data sets. BOLT-LMM: compute non-infinitesimal association statistics; BOLT-LMM\_ImmInfOnly: compute mixed model association statistics under the infinitesimal model

| Case:Control | Test                | Empirical Type 1 Error Rates |                             |
|--------------|---------------------|------------------------------|-----------------------------|
|              |                     | $\alpha = 5 \times 10^{-4}$  | $\alpha = 5 \times 10^{-8}$ |
| 1:1          | SAIGE               | $4.96 \times 10^{-4}$        | $4.65 \times 10^{-8}$       |
|              | SAIGE-NoSPA         | $4.54 \times 10^{-4}$        | $3.37 \times 10^{-8}$       |
|              | GMMAT               | $4.68 \times 10^{-4}$        | $3.52 \times 10^{-8}$       |
|              | BOLT-LMM_ImmInfOnly | $3.33 \times 10^{-4}$        | $2.18 \times 10^{-8}$       |
|              | BOLT-LMM            | $3.4 \times 10^{-4}$         | $3.04 \times 10^{-8}$       |
| 1:9          | SAIGE               | $4.49 \times 10^{-4}$        | $4.22 \times 10^{-8}$       |
|              | SAIGE-NoSPA         | $7.40 \times 10^{-4}$        | $1.44 \times 10^{-6}$       |
|              | GMMAT               | $8.0 \times 10^{-4}$         | $1.72 \times 10^{-6}$       |
|              | BOLT-LMM_ImmInfOnly | $7.66 \times 10^{-4}$        | $1.75 \times 10^{-6}$       |
|              | BOLT-LMM            | $7.73 \times 10^{-4}$        | $1.73 \times 10^{-6}$       |
| 1:99         | SAIGE               | $3.90 \times 10^{-4}$        | $1.29 \times 10^{-8}$       |
|              | SAIGE-NoSPA         | $3.25 \times 10^{-3}$        | $1.20 \times 10^{-4}$       |
|              | GMMAT               | $3.8 \times 10^{-3}$         | $1.73 \times 10^{-4}$       |
|              | BOLT-LMM_ImmInfOnly | $3.98 \times 10^{-3}$        | $1.95 \times 10^{-4}$       |
|              | BOLT-LMM            | $3.99 \times 10^{-3}$        | $1.94 \times 10^{-4}$       |

**Supplementary Table 6.** Test-specific  $\alpha$  levels SAIGE and GMMAT where empirical type I errors were equal to  $5 \times 10^{-8}$ . BOLT-LMM: compute non-infinitesimal association statistics; BOLT-LMM\_ImmInfOnly: compute mixed model association statistics under the infinitesimal model

| Case:Control | Test                | Test-specific $\alpha$ levels |
|--------------|---------------------|-------------------------------|
| 1:1          | SAIGE               | $5.26 \times 10^{-8}$         |
|              | SAIGE-NoSPA         | $6.76 \times 10^{-8}$         |
|              | BOLT-LMM_ImmInfOnly | $1.4 \times 10^{-7}$          |
|              | BOLT-LMM            | $7.4 \times 10^{-8}$          |
|              | GMMAT               | $6.52 \times 10^{-8}$         |
| 1:9          | SAIGE               | $5.64 \times 10^{-8}$         |
|              | SAIGE-NoSPA         | $8.0 \times 10^{-11}$         |
|              | BOLT-LMM_ImmInfOnly | $6.5 \times 10^{-11}$         |
|              | BOLT-LMM            | $1.6 \times 10^{-10}$         |
|              | GMMAT               | $5.0 \times 10^{-11}$         |
| 1:99         | SAIGE               | $1.22 \times 10^{-7}$         |
|              | SAIGE-NoSPA         | $3.32 \times 10^{-22}$        |
|              | BOLT-LMM_ImmInfOnly | $1.8 \times 10^{-25}$         |
|              | BOLT-LMM            | $5.3 \times 10^{-25}$         |
|              | GMMAT               | $5.85 \times 10^{-25}$        |

## References:

1. Chen, H. *et al.* Control for Population Structure and Relatedness for Binary Traits in Genetic Association Studies via Logistic Mixed Models. *Am J Hum Genet* **98**, 653–666 (2016).
2. E.F. Kaasschieter. Preconditioned conjugate gradients for solving singular systems. *J. Comput. Appl. Math.* **24**, 265–275 (1988).
3. Hestenes Eduard, M. R. and S. *Methods of conjugate gradients for solving linear systems.* **49**, (NBS, 1952).
4. Loh, P. R. *et al.* Efficient Bayesian mixed-model analysis increases association power in large cohorts. *Nat Genet* **47**, 284–290 (2015).
5. Van Der Sluis, A. & Van Der Vorst, H. A. The Rate of Convergence of Conjugate Gradients. *Numer. Math* **48**, 543–560 (1986).
6. Hutchinson, M. F. A stochastic estimator of the trace of the influence matrix for laplacian smoothing splines. *Commun. Stat. - Simul. Comput.* **19**, 433–450 (1990).
7. Avron, H. & Toledo, S. Randomized algorithms for estimating the trace of an implicit symmetric positive semi-definite matrix. *J. ACM* **58**, 1–34 (2011).
8. Allaire, J. *et al.* RcppParallel: Parallel Programming Tools for ‘Rcpp’. (2016).
9. Dey, R., Schmidt, E. M., Abecasis, G. R. & Lee, S. A fast and accurate algorithm to test for binary phenotypes and its application to PheWAS. *bioRxiv* (2017). doi:10.1101/109876
10. Svishcheva, G. R., Axenovich, T. I., Belonogova, N. M., van Duijn, C. M. & Aulchenko, Y. S. Rapid variance components–based method for whole-genome association analysis. *Nat. Genet.* **44**, 1166–1170 (2012).
11. Kang, H. M. *et al.* Variance component model to account for sample structure in genome-wide association studies. *Nat Genet* **42**, 348–354 (2010).
12. Denny, J. C. *et al.* Systematic comparison of phenome-wide association study of electronic medical record data and genome-wide association study data. *Nat Biotechnol* **31**, 1102–1110 (2013).
13. Kathiresan, S. A PCSK9 missense variant associated with a reduced risk of early-onset myocardial infarction. *N Engl J Med* **358**, 2299–2300 (2008).
14. CARDIoGRAMplusC4D Consortium *et al.* Large-scale association analysis identifies new risk loci for coronary artery disease. *Nat Genet* **45**, 25–33 (2013).
15. Nikpay, M. *et al.* A comprehensive 1,000 Genomes-based genome-wide association meta-analysis of coronary artery disease. *Nat Genet* **47**, 1121–1130 (2015).
16. Verweij, N., Eppinga, R. N., Hagemmeijer, Y. & van der Harst, P. Identification of 15 novel risk loci for coronary artery disease and genetic risk of recurrent events, atrial fibrillation and heart failure. *Sci. Rep.* **7**, 2761 (2017).
17. Reiner, A. P. *et al.* Common coding variants of the HNF1A gene are associated with multiple

cardiovascular risk phenotypes in community-based samples of younger and older European-American adults: the Coronary Artery Risk Development in Young Adults Study and The Cardiovascular Health Study. *Circ. Cardiovasc. Genet.* **2**, 244–54 (2009).

18. Haiman, C. A. *et al.* A common genetic risk factor for colorectal and prostate cancer. *Nat. Genet.* **39**, 954–956 (2007).
19. Jaeger, E. *et al.* Common genetic variants at the CRAC1 (HMPS) locus on chromosome 15q13.3 influence colorectal cancer risk. *Nat. Genet.* **40**, 26–28 (2008).
20. Broderick, P. *et al.* A genome-wide association study shows that common alleles of SMAD7 influence colorectal cancer risk. *Nat. Genet.* **39**, 1315–1317 (2007).
21. Pereira, J. S. *et al.* Identification of a novel germline FOXE1 variant in patients with familial non-medullary thyroid carcinoma (FNMTTC). *Endocrine* **49**, 204–214 (2015).
